# Supplementary material for: Quantifying the demographic cost of human-related mortality to a raptor population
Source: PLOS journal article supplement (doi:10.1371/journal.pone.0172232), 2017-02-24
Supplement: S6 (10.1371/journal.pone.0172232.s006) [file journal.pone.0172232.s006]

## S6 Appendix. Known fate model selection results

Ranking of known-fate models considered for estimation of annual survival for four stage-classes of golden eagles radio-tagged in the vicinity of the Altamont Pass windfarm, 1994–2000. We modeled time effects as constant (.) or varying among seasonal (3-mo) time intervals ( $t$ ). Results shown are based on analyses that included all anthropogenic-caused deaths.

| Stage class and model | AIC <sub>c</sub> | ΔAIC <sub>c</sub> | AIC <sub>c</sub> weight | No. parameters | Deviance |
|-----------------------|------------------|-------------------|-------------------------|----------------|----------|
| <b>Juveniles</b>      |                  |                   |                         |                |          |
| {S( $t$ )}            | 120.860          | 0.00              | 0.671                   | 4              | 3.081    |
| {S(.)}                | 123.393          | 2.53              | 0.189                   | 1              | 11.727   |
| {S(sex)}              | 124.846          | 3.99              | 0.091                   | 2              | 11.155   |
| {S(sex* $t$ )}        | 126.112          | 5.25              | 0.049                   | 8              | 0.000    |
| <b>Subadults</b>      |                  |                   |                         |                |          |
| {S(.)}                | 321.172          | 0.00              | 0.718                   | 1              | 26.736   |
| {S(sex)}              | 323.101          | 1.93              | 0.274                   | 2              | 26.654   |
| {S( $t$ )}            | 330.124          | 8.95              | 0.008                   | 12             | 13.275   |
| {S(sex* $t$ )}        | 342.064          | 20.89             | 0.000                   | 24             | 0.000    |
| <b>Floaters</b>       |                  |                   |                         |                |          |
| {S(.)}                | 117.454          | 0.00              | 0.713                   | 1              | 26.993   |
| {S(sex)}              | 119.359          | 1.91              | 0.275                   | 2              | 26.873   |
| {S( $t$ )}            | 125.696          | 8.24              | 0.012                   | 12             | 12.247   |
| {S(sex* $t$ )}        | 140.449          | 22.99             | 0.000                   | 24             | 0.000    |
| <b>Breeders</b>       |                  |                   |                         |                |          |
| {S(.)}                | 114.491          | 0.00              | 0.732                   | 1              | 27.404   |
| {S(sex)}              | 116.506          | 2.01              | 0.267                   | 2              | 27.403   |
| {S( $t$ )}            | 129.775          | 15.28             | 0.000                   | 16             | 11.534   |
| {S(sex* $t$ )}        | 153.751          | 39.26             | 0.000                   | 32             | 0.000    |

AIC<sub>c</sub> = Akaike's Information Criterion adjusted for small sample size, Δ AIC<sub>c</sub> = difference between the AIC<sub>c</sub> value of each model and the lowest AIC<sub>c</sub> model, AIC<sub>c</sub> wt = Akaike weight.
